# Supplementary material for: Overexpression of hgc1 increases the production and diversity of hygrocins in Streptomyces sp. LZ35
Source: Royal Society of Chemistry journal article supplement (doi:10.1039/c5ra12623a), 2015-01-01
Supplement: c5ra12623a1.pdf [file c5ra12623a1.pdf]

**Electronic Supplementary Information**

**Overexpression of Hgc1 increases the production and diversity of  
hygrocins in *Streptomyces* sp. LZ35**

Shanren Li, Chunhua Lu, Jinhuan Ou, Jingjing Deng, and Yuemao Shen\*

Key Laboratory of Chemical Biology (Ministry of Education), School of Pharmaceutical  
Sciences, Shandong University, Jinan, 250012, China

\*Correspondance:

Yuemao Shen, Tel: 086-531-88382108; E-mail: [yshen@sdu.edu.cn](mailto:yshen@sdu.edu.cn)

**Figure S1.** HPLC analysis of SR101OEhgc1 Sephadex LH-20

**Figure S2.** HPLC analysis of SR101OEhgc1 Fr. 6c (16-20#)

**Figure S3.** HPLC analysis of SR101OEhgc1 Fr. 7 RP-18

**Figure S4.** HPLC analysis of SR101OEhgc1 Fr. 7d1

**Figure S5.**  $^1\text{H}$  NMR (600 MHz,  $\text{CD}_3\text{OD}$ ) spectrum for compound **1**

**Figure S6.**  $^{13}\text{C}$  NMR (151 MHz,  $\text{CD}_3\text{OD}$ ) spectrum for compound **1**

**Figure S7.** HMQC spectrum for compound **1**

**Figure S8.** HMBC spectrum for compound **1**

**Figure S9.**  $^1\text{H}$ - $^1\text{H}$  COSY spectrum for compound **1**

**Figure S10.**  $^1\text{H}$  NMR (600 MHz,  $\text{CD}_3\text{OD}$ ) spectrum for compound **2**

**Figure S11.**  $^{13}\text{C}$  NMR (151 MHz,  $\text{CD}_3\text{OD}$ ) spectrum for compound **2**

**Figure S12.** HMQC spectrum for compound **2**

**Figure S13.** HMBC spectrum for compound **2**

**Figure S14.** NOE spectrum for compound **2**

**Figure S15.**  $^1\text{H}$  NMR (600 MHz,  $\text{CD}_3\text{OD}$ ) spectrum for compound **3**

**Figure S16.**  $^{13}\text{C}$  NMR (151 MHz,  $\text{CD}_3\text{OD}$ ) spectrum for compound **3**

**Figure S17.** HMQC spectrum for compound **3**

**Figure S18.** HMBC spectrum for compound **3**

**Figure S19.**  $^1\text{H}$ - $^1\text{H}$  COSY spectrum for compound **3**

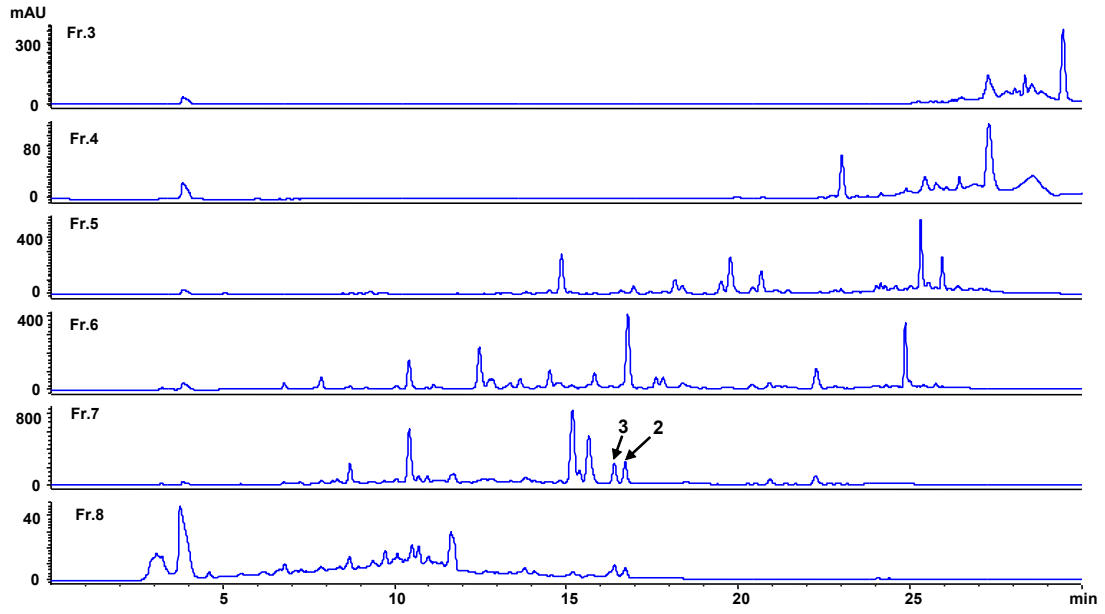

**Figure S1.** HPLC analysis of SR101OEhg1 Sephadex LH-20

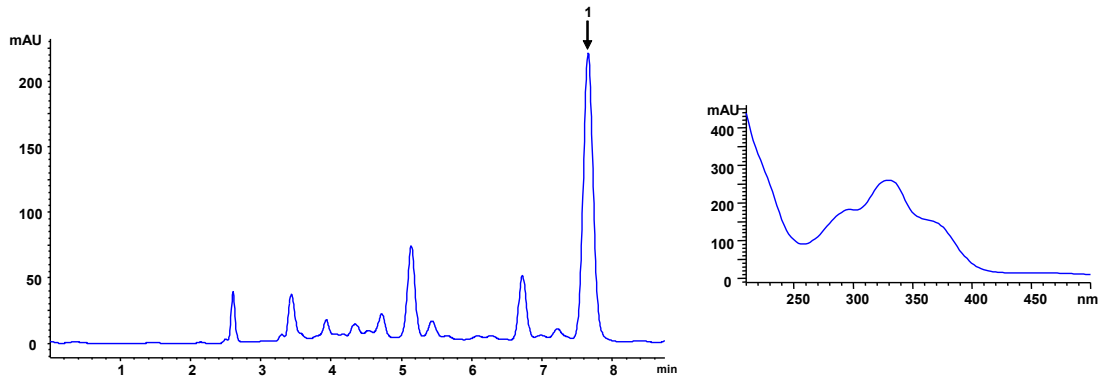

**Figure S2.** HPLC analysis of SR101OEhg1 Fr. 6c (16-20#)

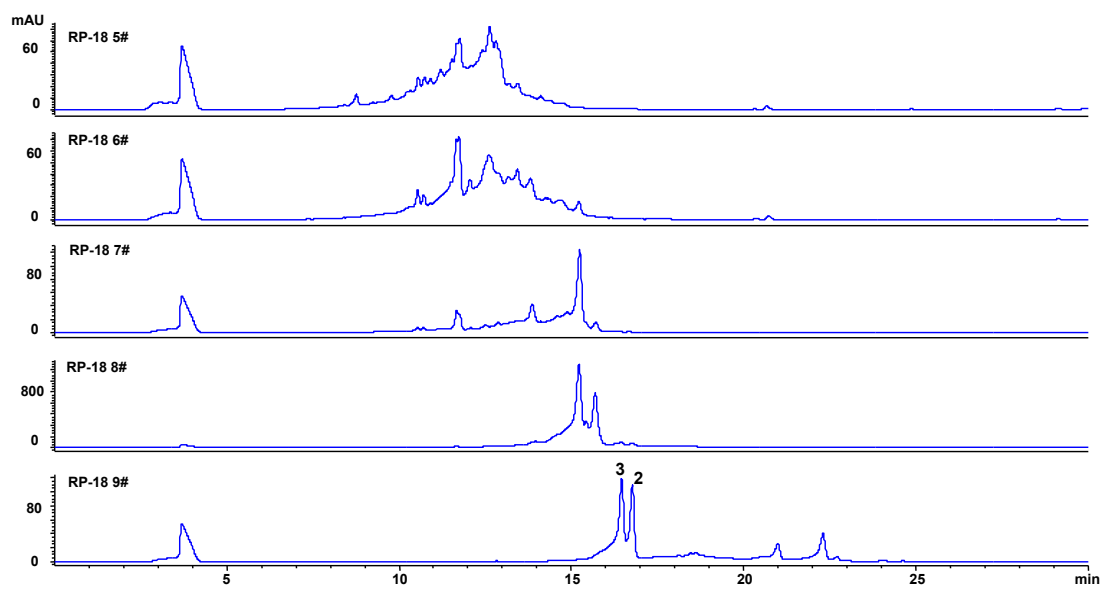

**Figure S3.** HPLC analysis of SR101OEhgc1 Fr. 7 RP-18

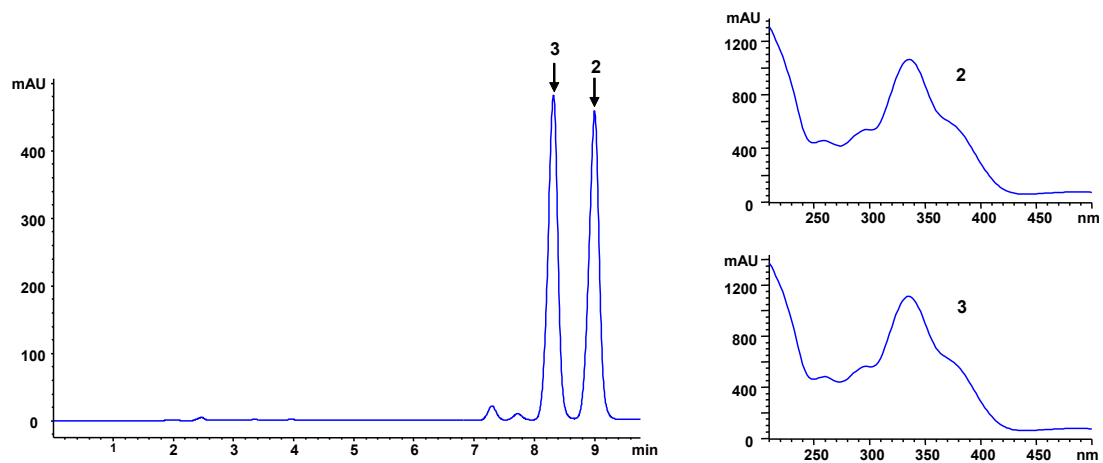

**Figure S4.** HPLC analysis of SR101OEhgc1 Fr. 7d1

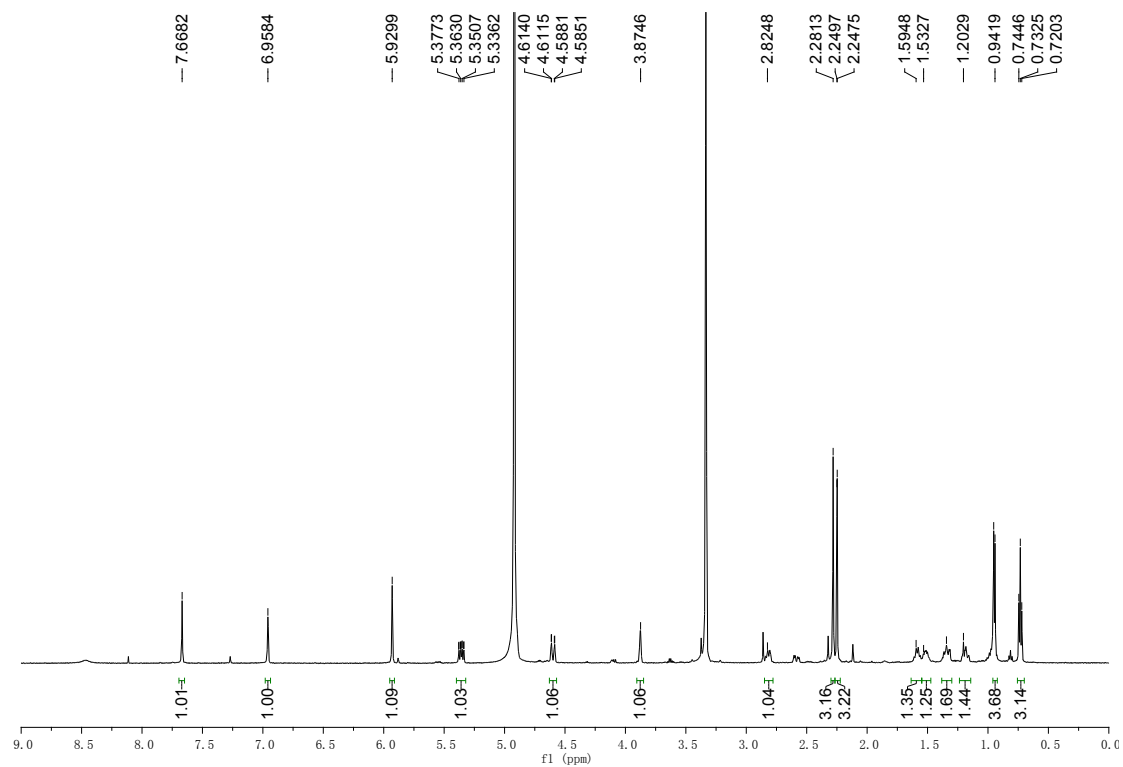

Figure S5.  $^1\text{H}$  NMR (600 MHz,  $\text{CD}_3\text{OD}$ ) spectrum for compound **1**

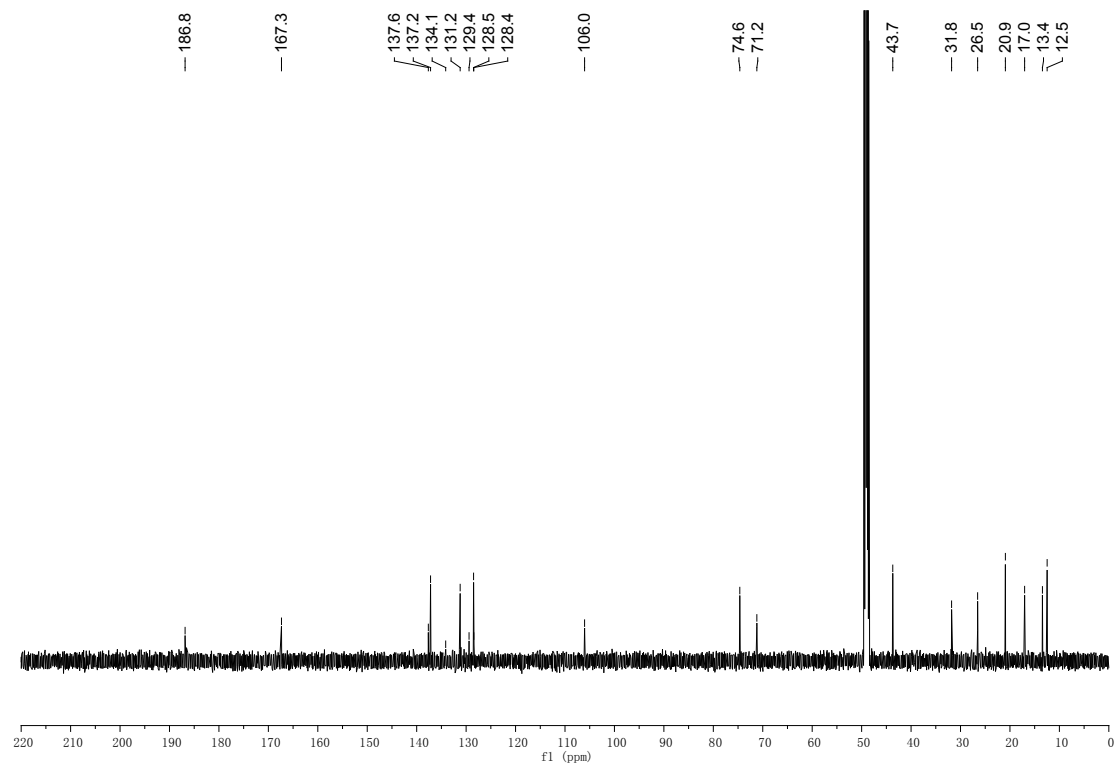

Figure S6.  $^{13}\text{C}$  NMR (151 MHz,  $\text{CD}_3\text{OD}$ ) spectrum for compound **1**

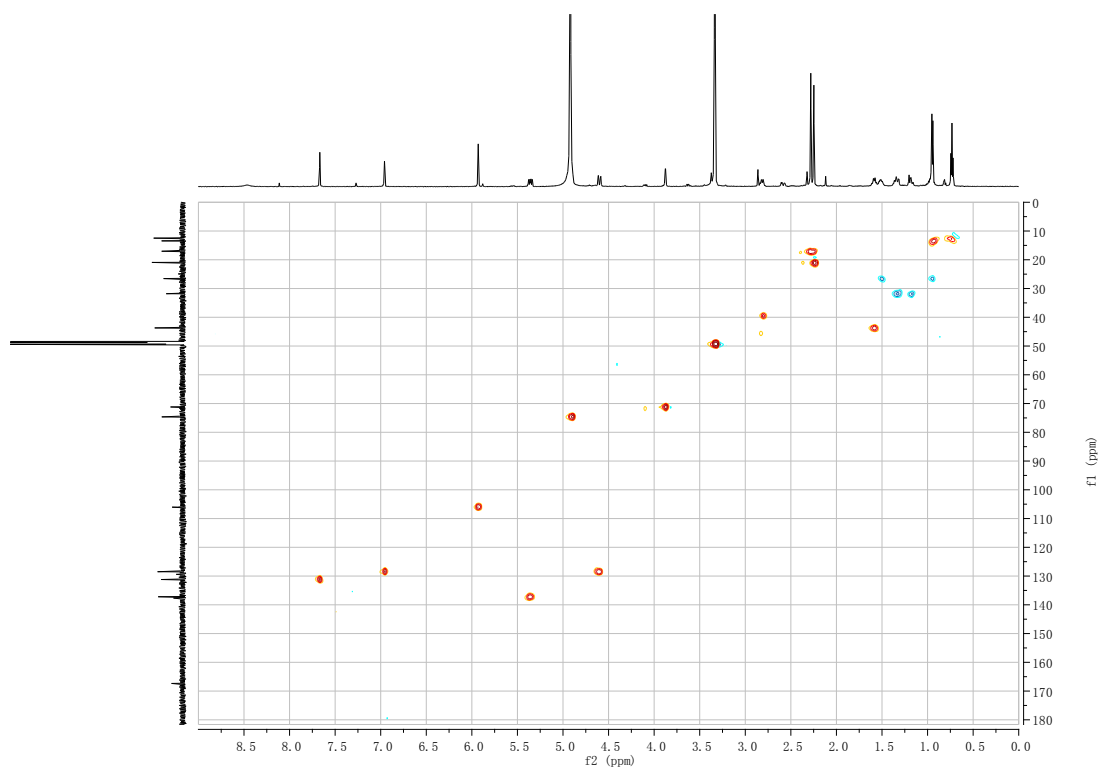

Figure S7. HMQC spectrum for compound 1

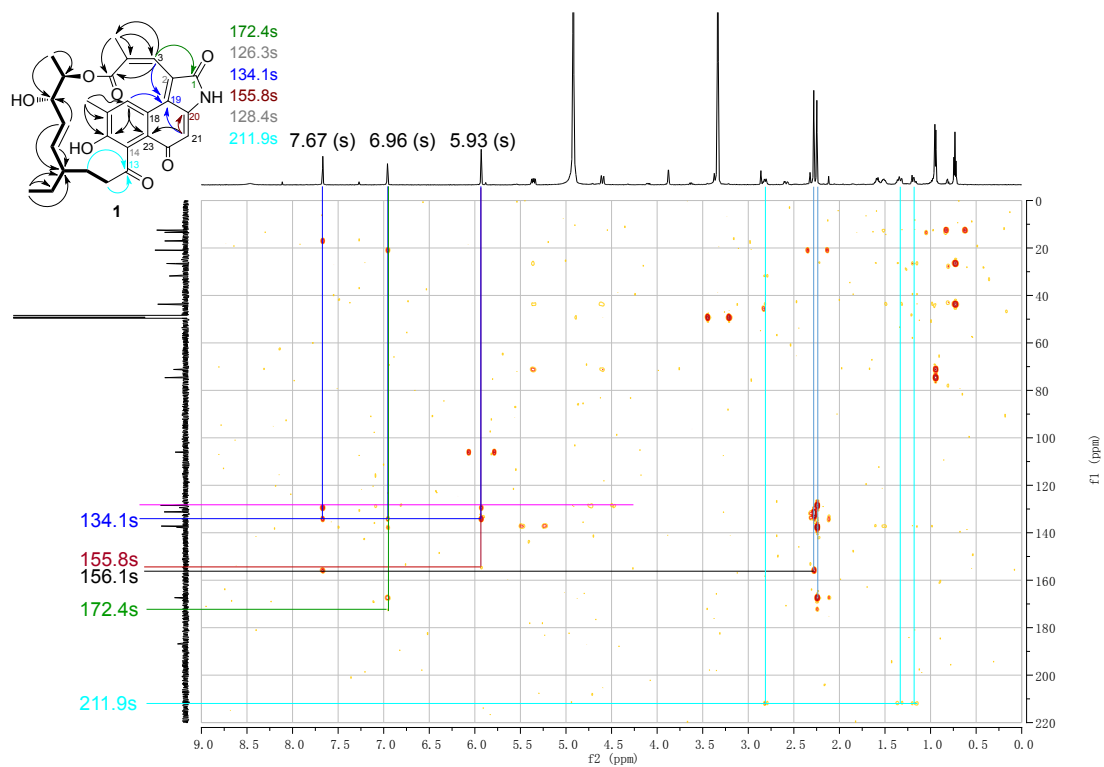

Figure S8. HMBC spectrum for compound 1

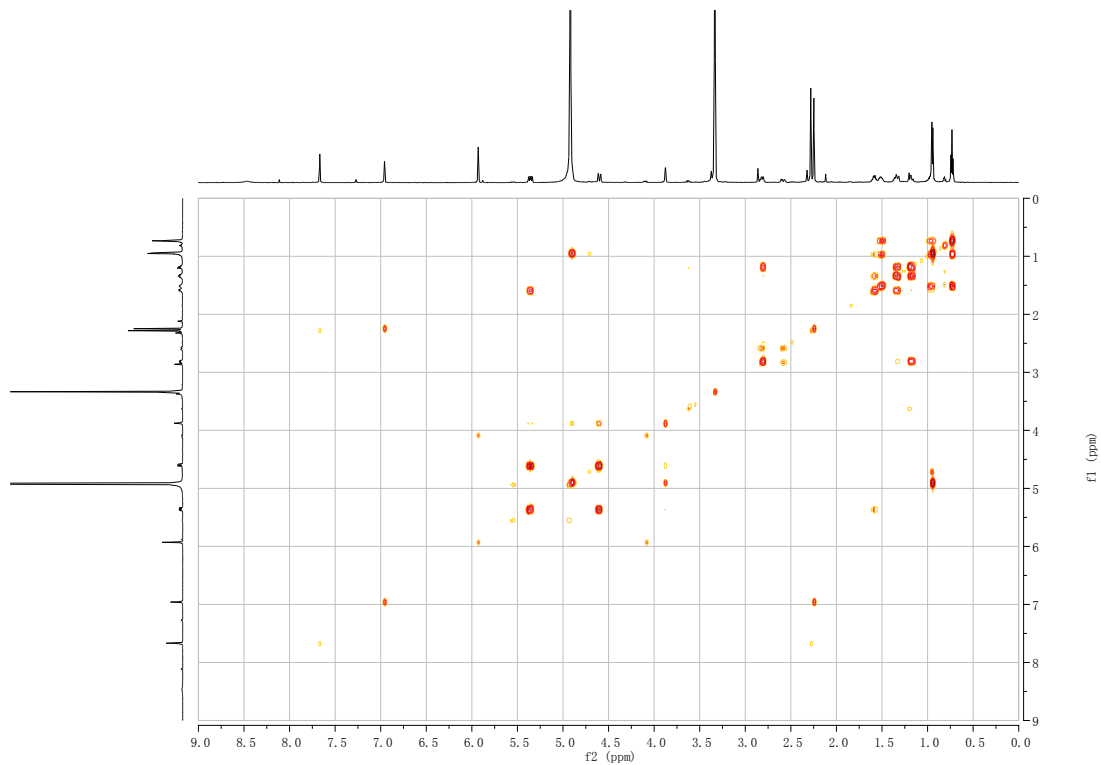

**Figure S9.**  $^1\text{H}$ - $^1\text{H}$  COSY spectrum for compound **1**

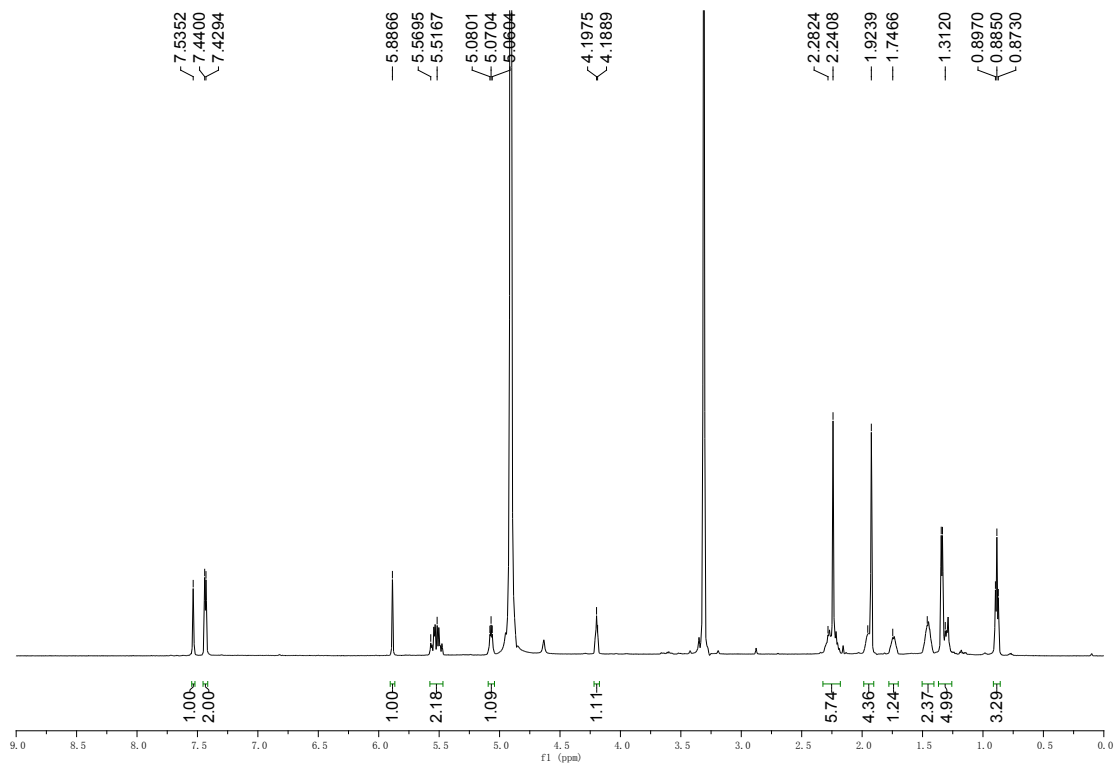

**Figure S10.**  $^1\text{H}$  NMR (600 MHz,  $\text{CD}_3\text{OD}$ ) spectrum for compound **2**

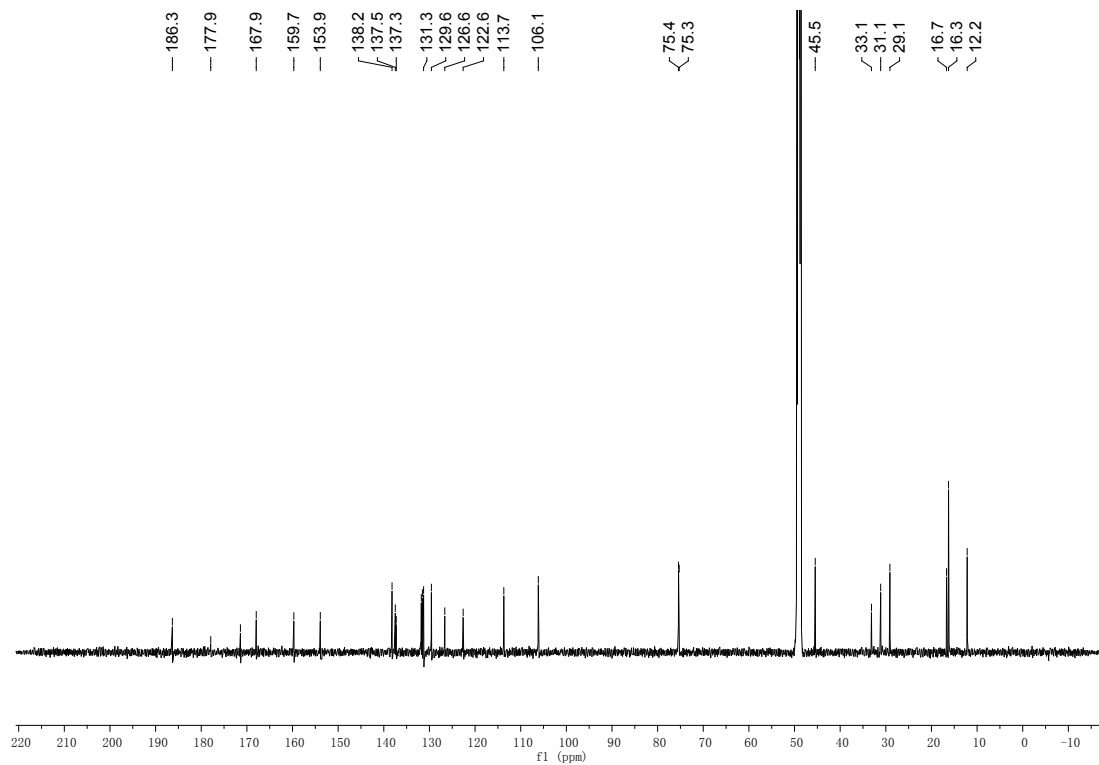

**Figure S11.**  $^{13}\text{C}$  NMR (151 MHz,  $\text{CD}_3\text{OD}$ ) spectrum for compound **2**

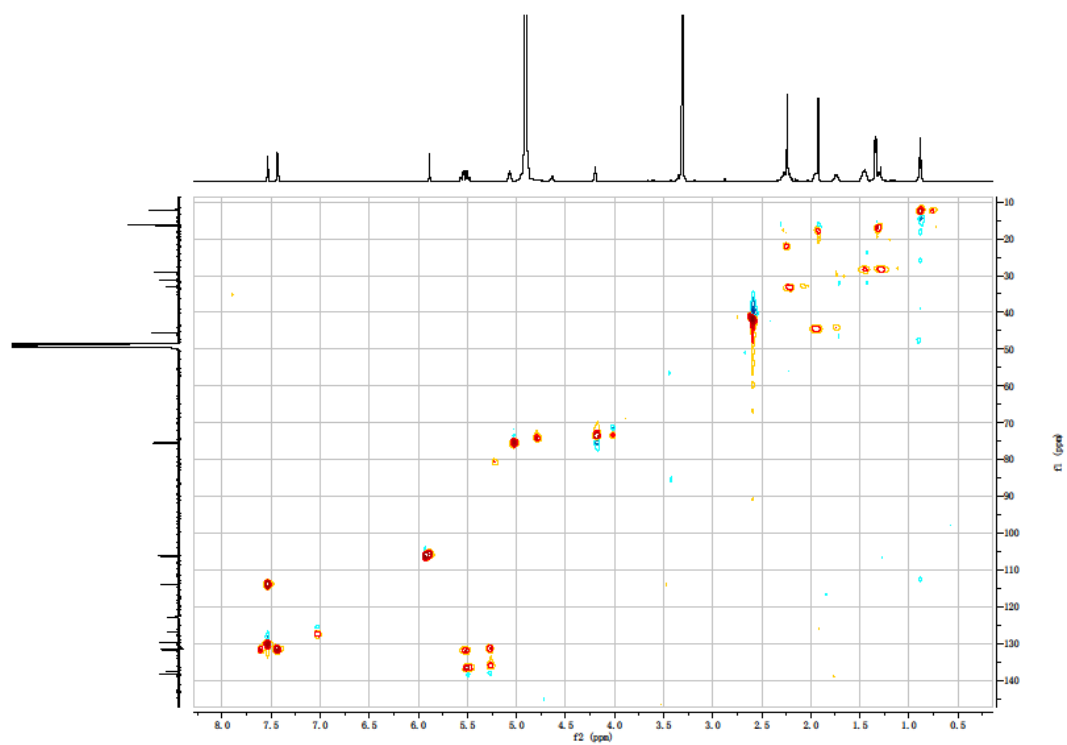

**Figure S12.** HMBC spectrum for compound **2**



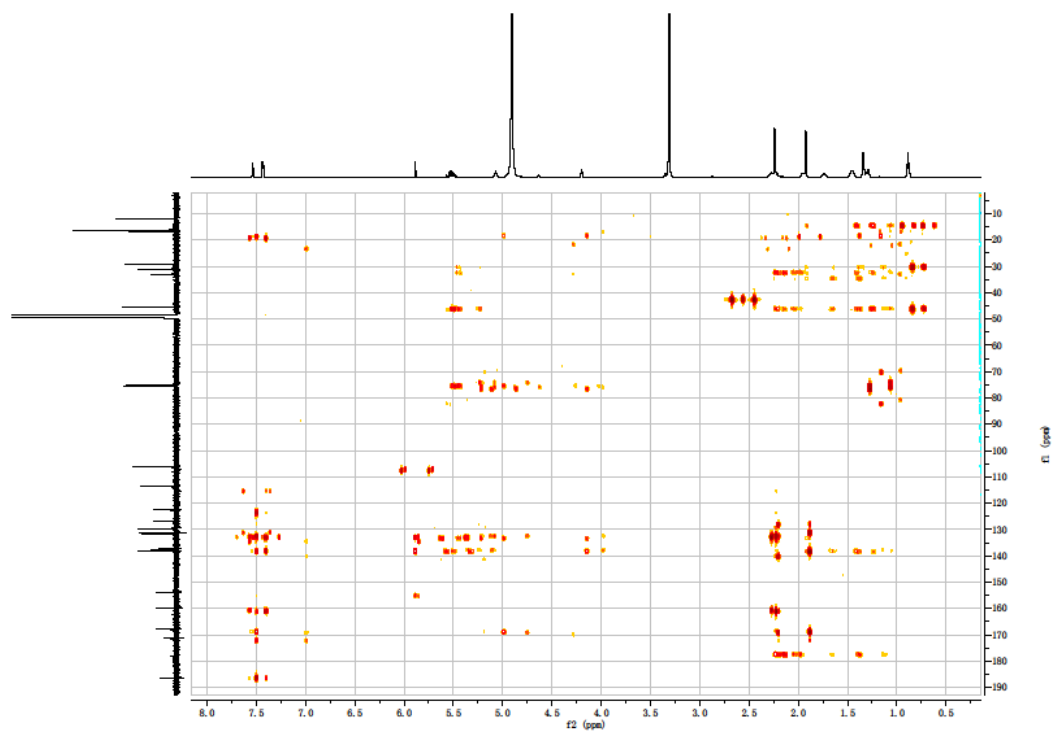

Figure S13. HMBC spectrum for compound 2

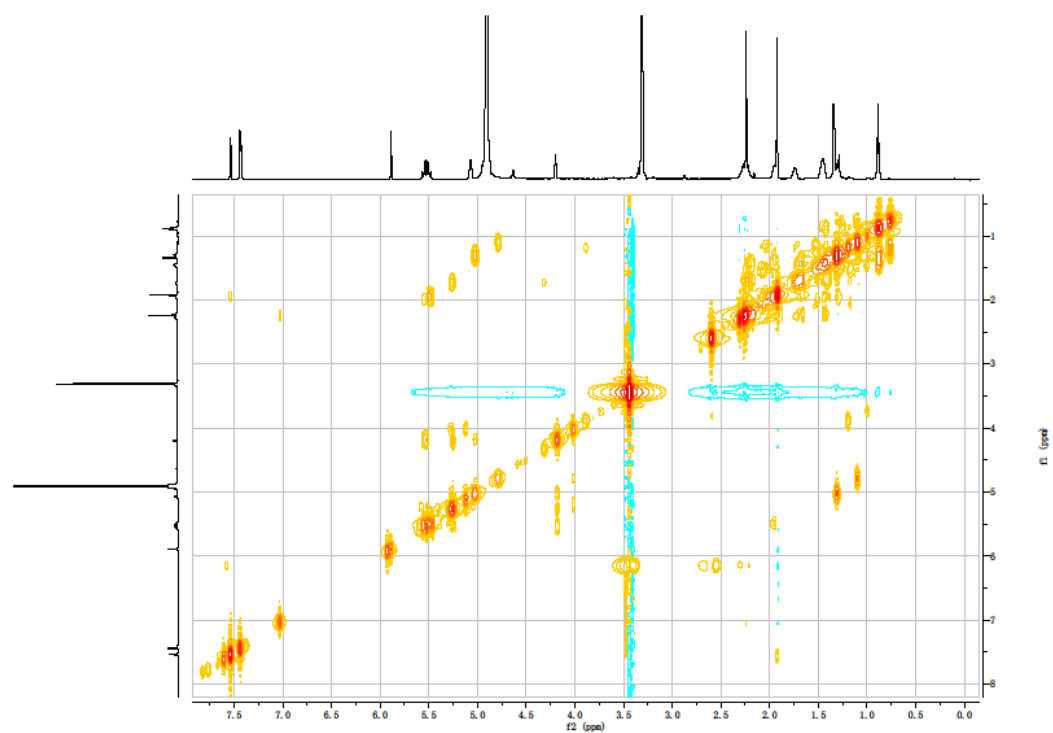

Figure S14. NOE spectrum for compound 2

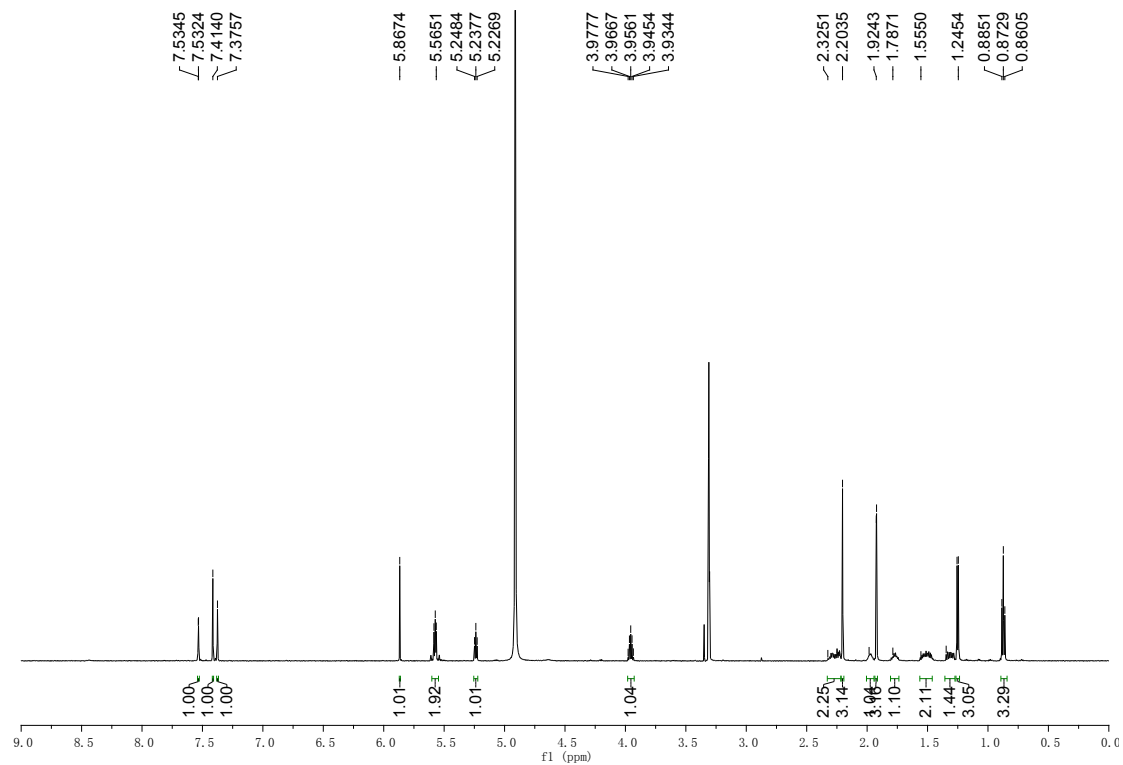

Figure S15.  $^1\text{H}$  NMR (600 MHz,  $\text{CD}_3\text{OD}$ ) spectrum for compound **3**

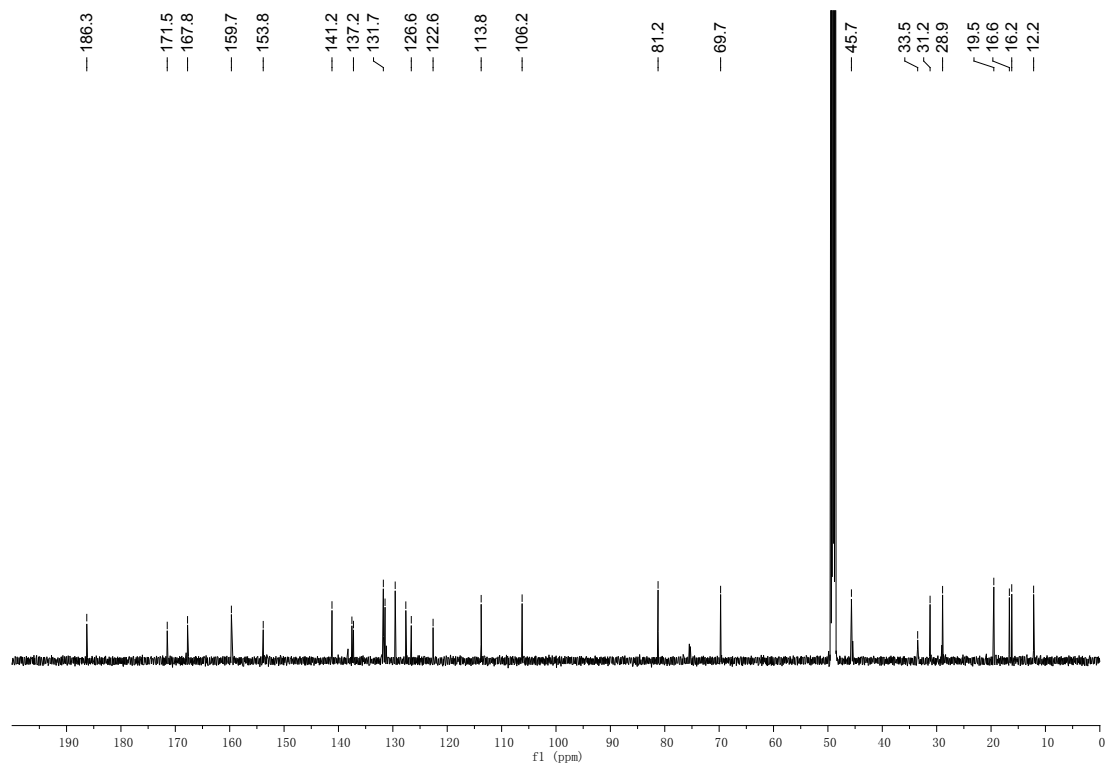

Figure S16.  $^{13}\text{C}$  NMR (151 MHz,  $\text{CD}_3\text{OD}$ ) spectrum for compound **3**

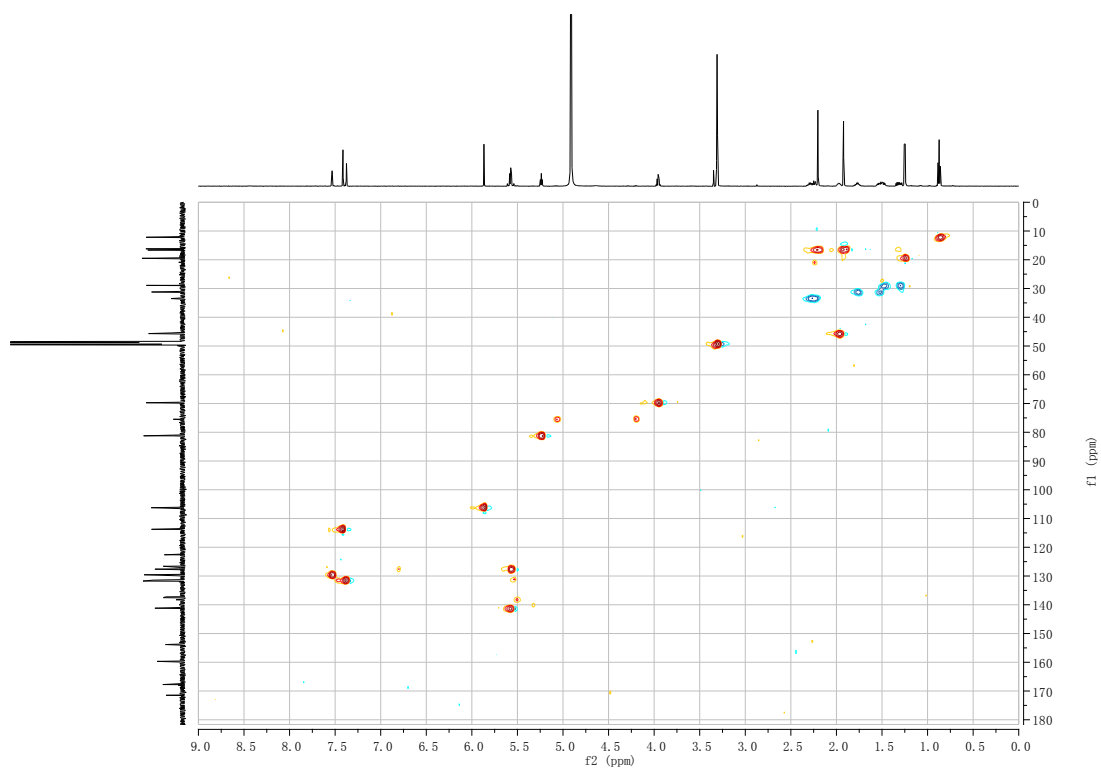

**Figure S17.** HMQC spectrum for compound **3**

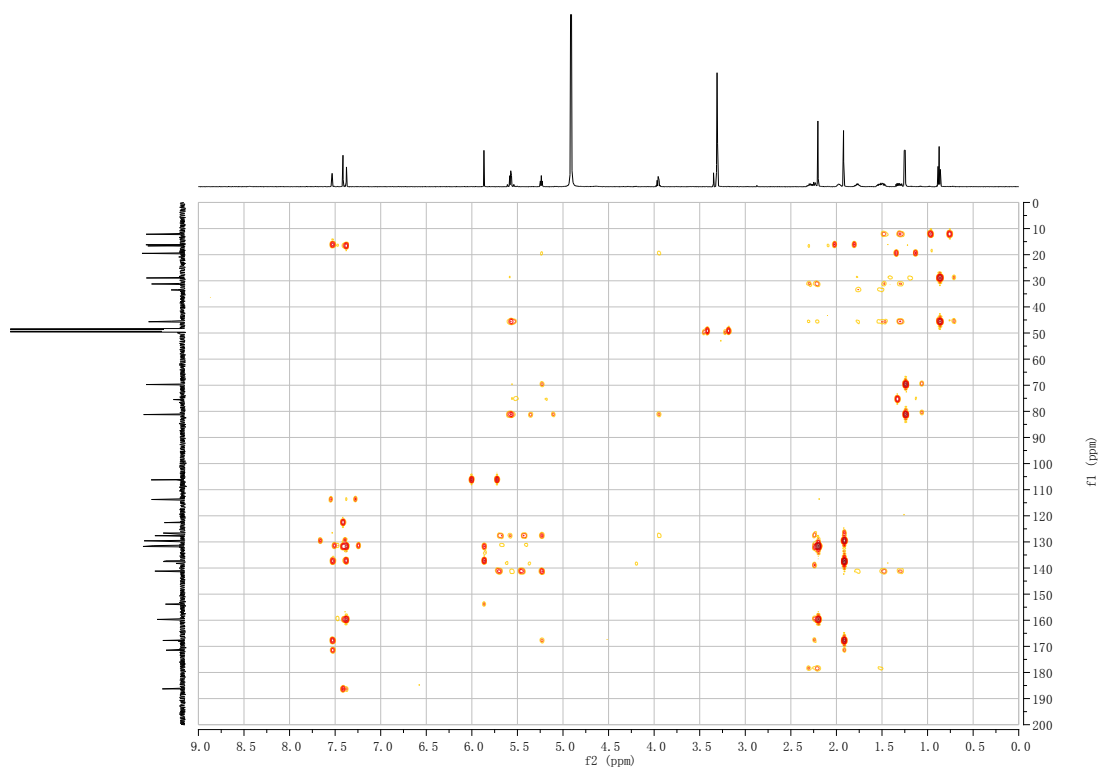

**Figure S18.** HMBC spectrum for compound **3**

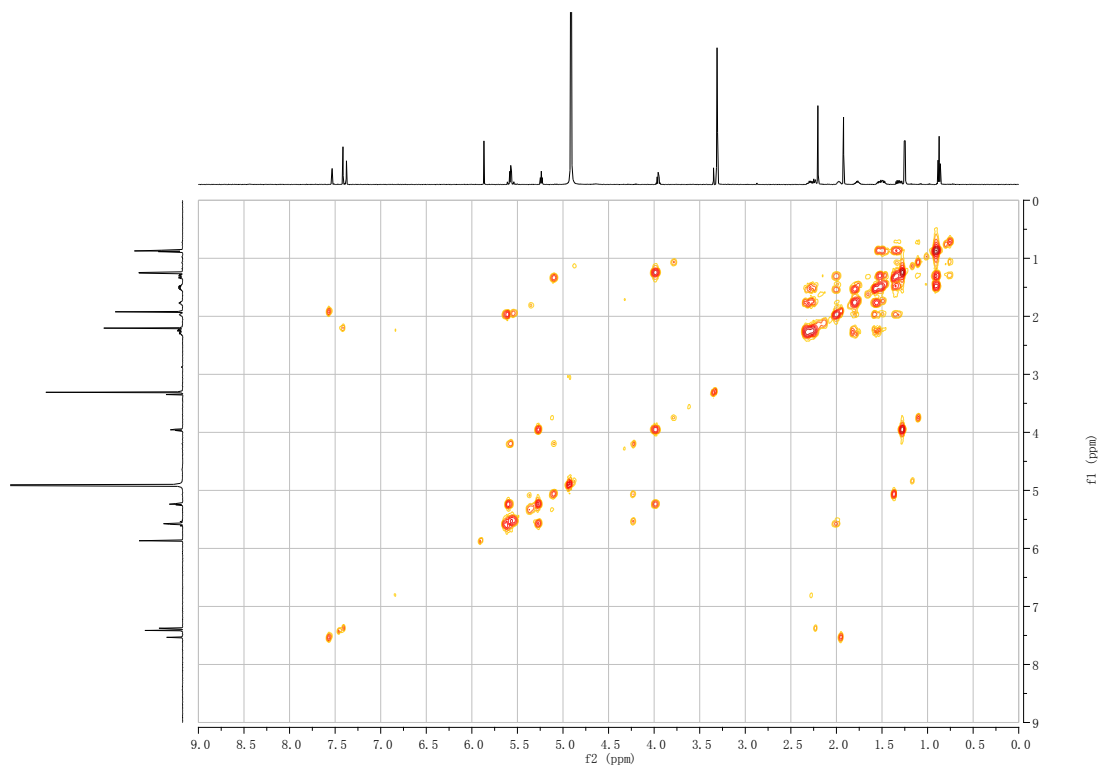

**Figure S19.**  $^1\text{H}$ - $^1\text{H}$  COSY spectrum for compound 3
